# Supplementary material for: Genetic Evidence for the Role of the Vacuole in Supplying Secretory Organelles with Ca2+ in Hansenula polymorpha
Source: PubMed Central journal article supplement (PMC4696657; doi:10.1371/journal.pone.0145915), 2015-12-30
Supplement: pone.0145915.s001.pdf [file pone.0145915.s001.pdf]

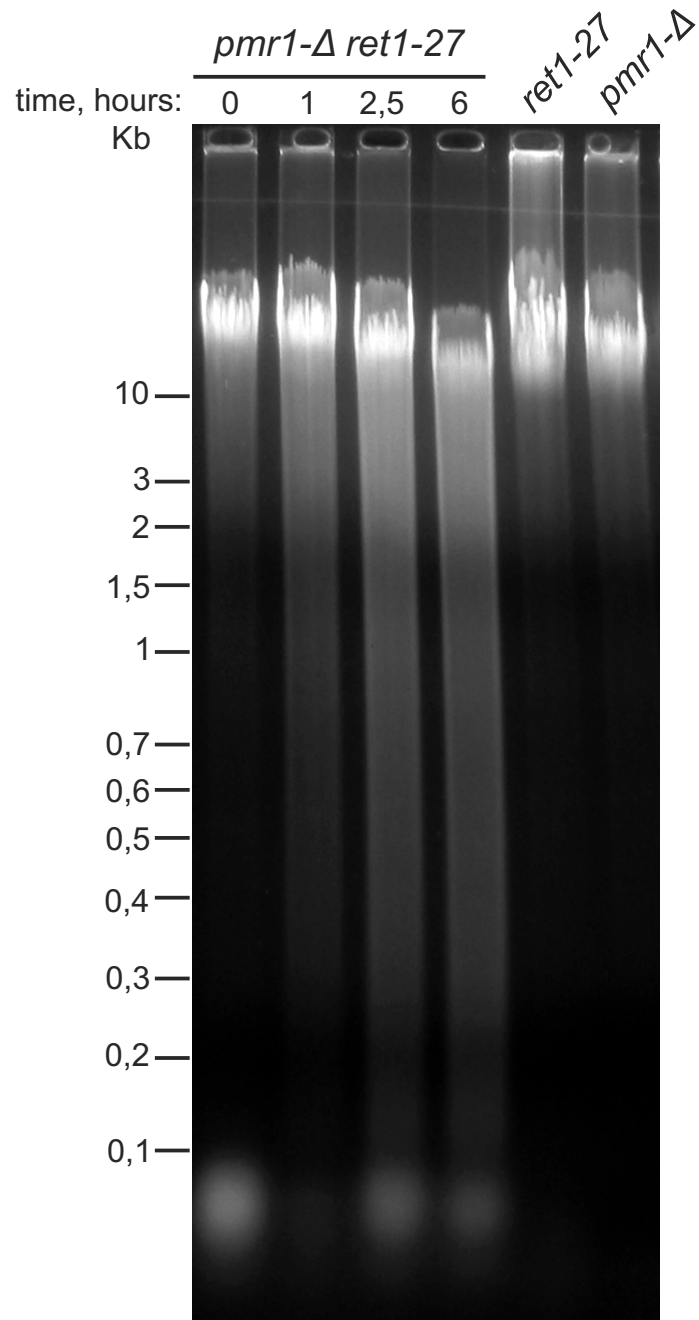

**S1 Fig. Electrophoresis of chromosomal DNA of the MC39 strain lacking the *PMR1*-containing plasmid (*pmr1-Δ ret1-27*).** The MC39 cells lacking the *PMR1*-containing plasmid were grown in YPD supplemented with 10 mM  $\text{CaCl}_2$ , spun down, re-suspended in regular YPD medium and incubated for the indicated time. Chromosomal DNA samples of the MC39 bearing the *PMR1*-containing plasmid (*ret1-27*) and 1MA77/12 (*pmr1-Δ*) strains grown in regular YPD were used as a control.
