# Supplementary material for: Genetic Evidence for the Role of the Vacuole in Supplying Secretory Organelles with Ca2+ in Hansenula polymorpha
Source: PubMed Central journal article supplement (PMC4696657; doi:10.1371/journal.pone.0145915), 2015-12-30
Supplement: pone.0145915.s002.pdf [file pone.0145915.s002.pdf]

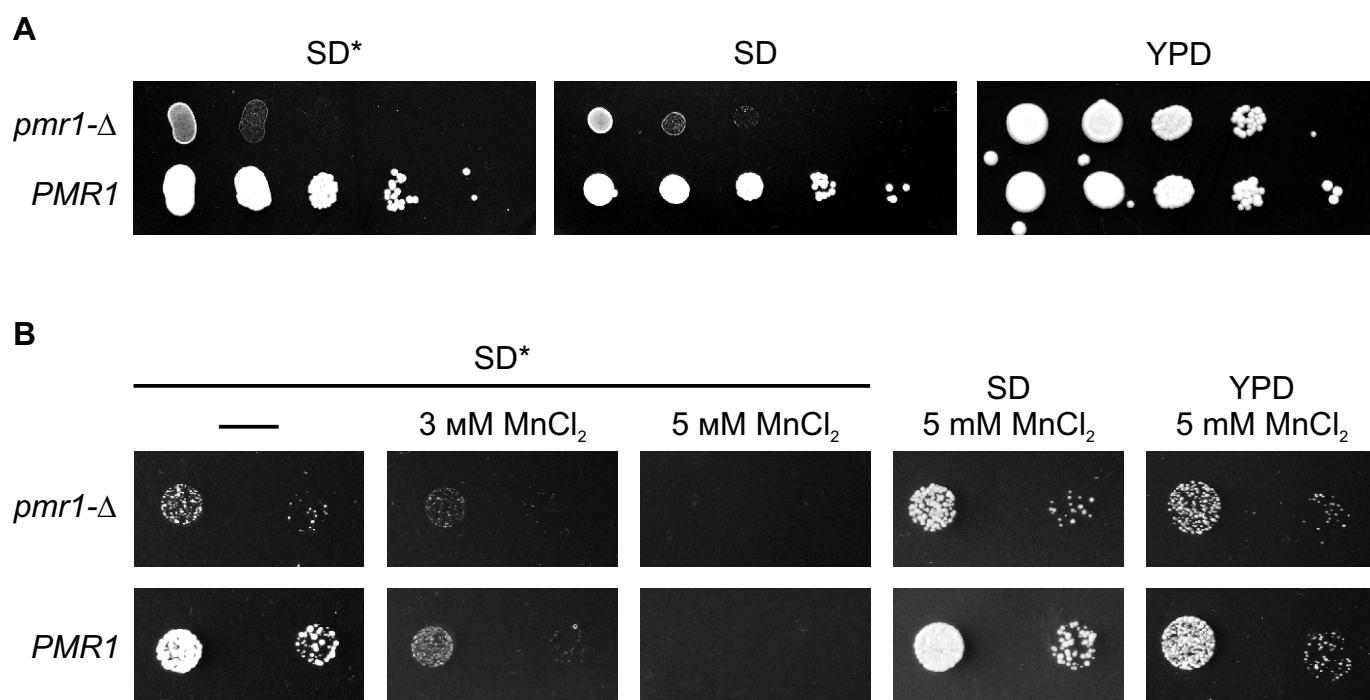

**S2 Fig. Effect of media composition on growth of the *pmr1-Δ* mutant (A) and on sensitivity of *H. polymorpha* cells to MnCl<sub>2</sub> (B).** Cell suspensions with equal densities were serially diluted (10-fold) and spotted onto corresponding media. *pmr1-Δ*, subclone of the 1MA27/12/GP1 strain lacking the *PMR1* containing plasmid; *PMR1*, 1MA27/12/GP1 strain. Only two most representative dilutions are shown in the panel B.
