# Supplementary material for: Genetic Evidence for the Role of the Vacuole in Supplying Secretory Organelles with Ca2+ in Hansenula polymorpha
Source: PubMed Central journal article supplement (PMC4696657; doi:10.1371/journal.pone.0145915), 2015-12-30
Supplement: pone.0145915.s003.pdf [file pone.0145915.s003.pdf]

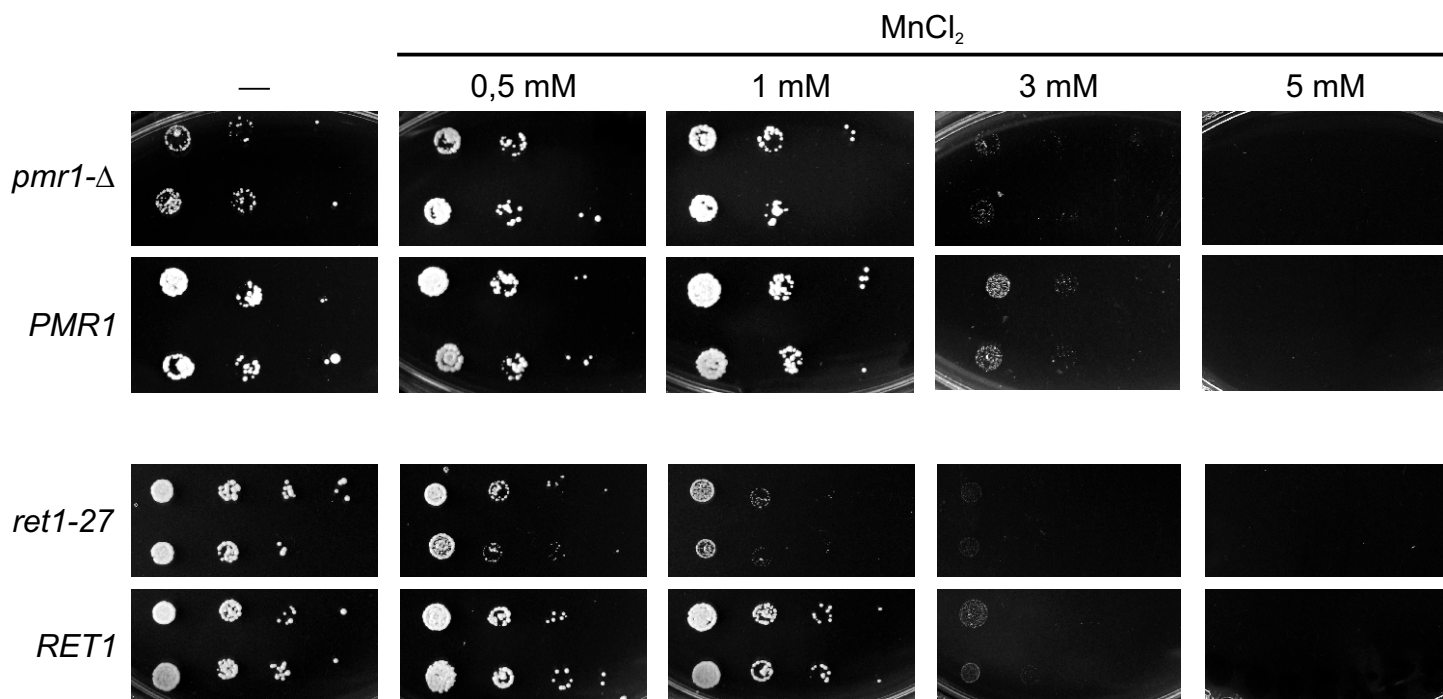

**S3 Fig. Growth of the *pmr1-Δ* and *ret1-27* mutants on SD\* medium supplemented with different concentrations of MnCl<sub>2</sub>.** Cell suspensions with equal densities were serially diluted (10-fold) and spotted onto corresponding media. Two subclones of each strain were analysed. *pmr1-Δ*, subclone of the 1MA27/12/GP1 strain lacking the *PMR1* containing plasmid; *PMR1*, 1MA27/12/GP1 strain; *ret1-27*, 64MA70QAL strain; *RET1*, 64MA70QA-RET strain.
