# Supplementary material for: Genetic Evidence for the Role of the Vacuole in Supplying Secretory Organelles with Ca2+ in Hansenula polymorpha
Source: PubMed Central journal article supplement (PMC4696657; doi:10.1371/journal.pone.0145915), 2015-12-30
Supplement: pone.0145915.s006.pdf [file pone.0145915.s006.pdf]

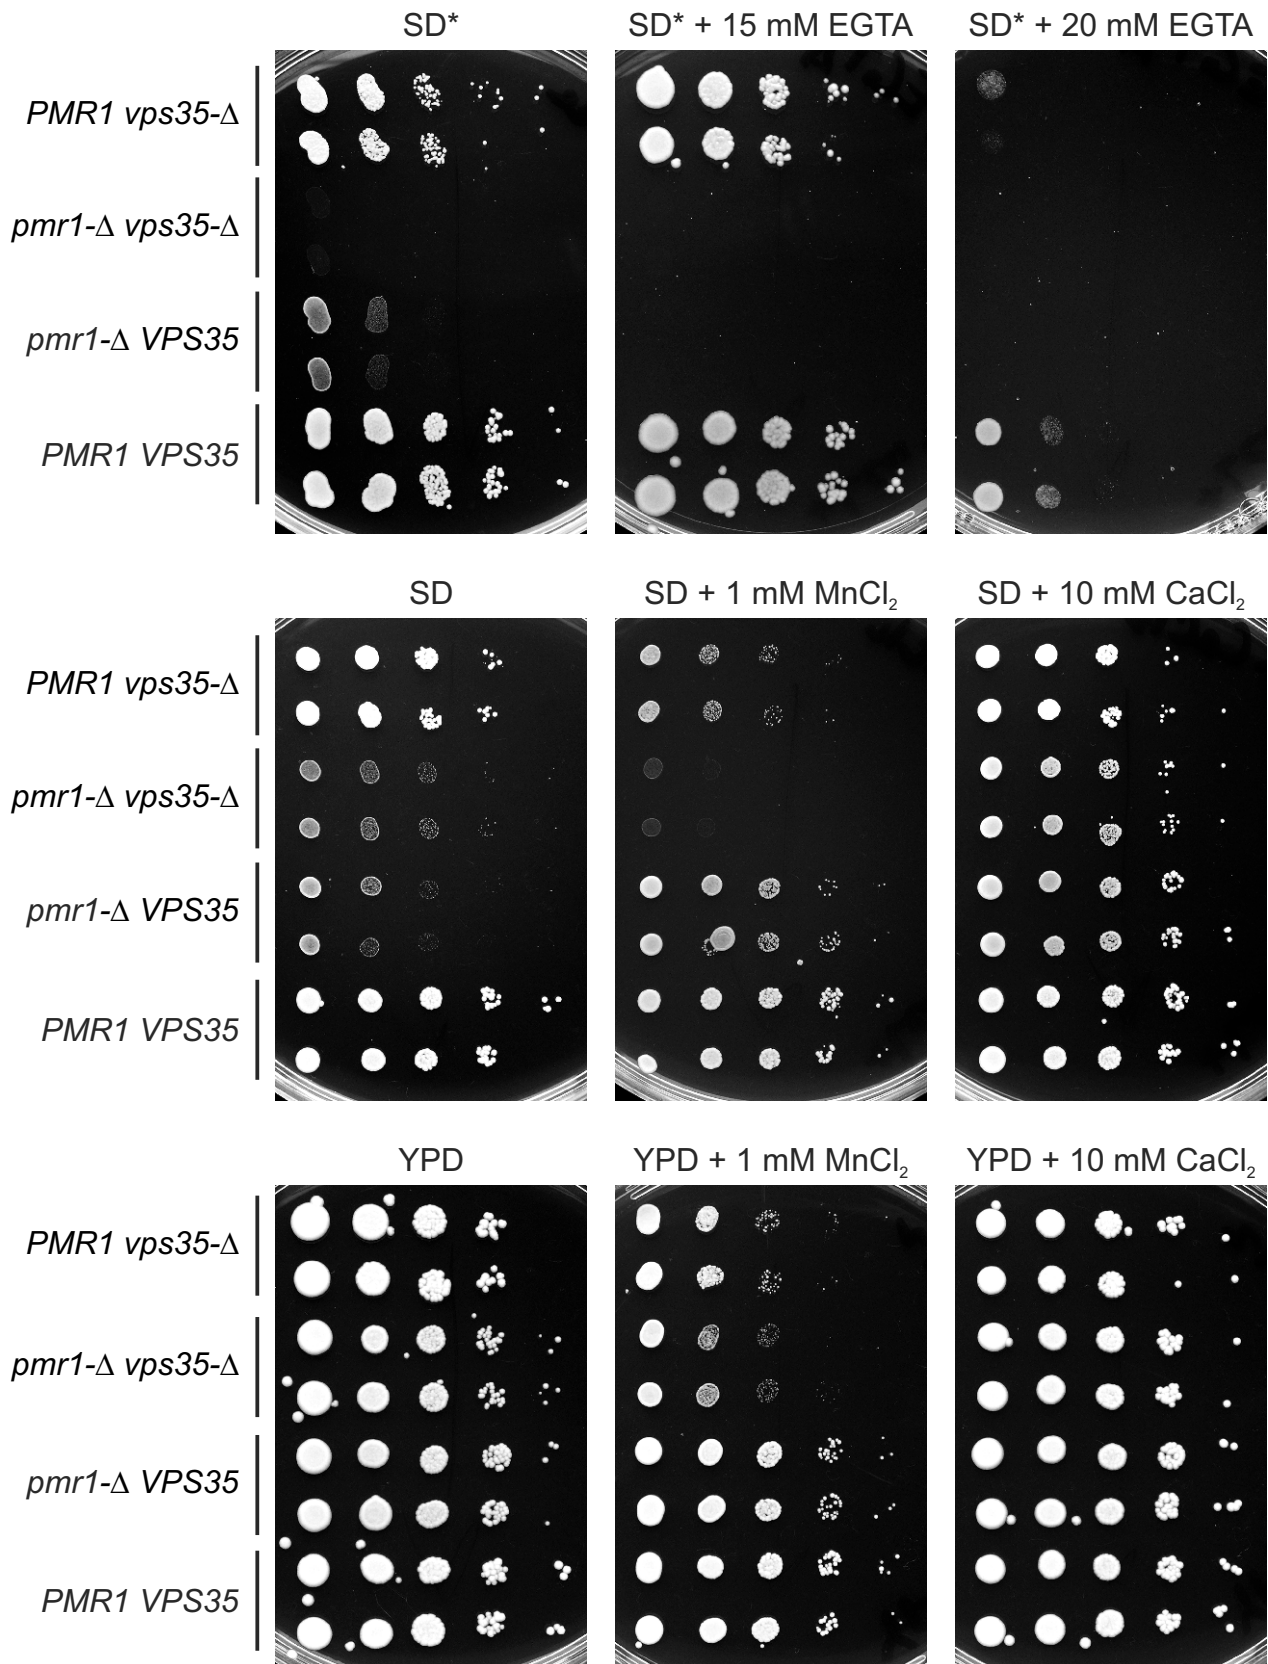

**S6 Fig. Effect of the *vps35-Δ* mutation on growth of strains with or without the *PMR1* gene.** Cell suspensions with equal densities were serially diluted (10-fold) and spotted onto corresponding media. Two subclones of each strain were analysed. *pmr1-Δ vps35-Δ*, 1MA27/12/GP1-Δ*vps35* strain lacking the plasmid with *PMR1*; *vps35-Δ*, 1MA27/12/GP1-Δ*vps35* strain, *pmr1-Δ VPS35*, 1MA27/12/GP1 strain lacking the plasmid with *PMR1*; *PMR1 VPS35*, 1MA27/12/GP1 strain.
