# Supplementary material for: Genetic Evidence for the Role of the Vacuole in Supplying Secretory Organelles with Ca2+ in Hansenula polymorpha
Source: PubMed Central journal article supplement (PMC4696657; doi:10.1371/journal.pone.0145915), 2015-12-30
Supplement: pone.0145915.s007.pdf [file pone.0145915.s007.pdf]

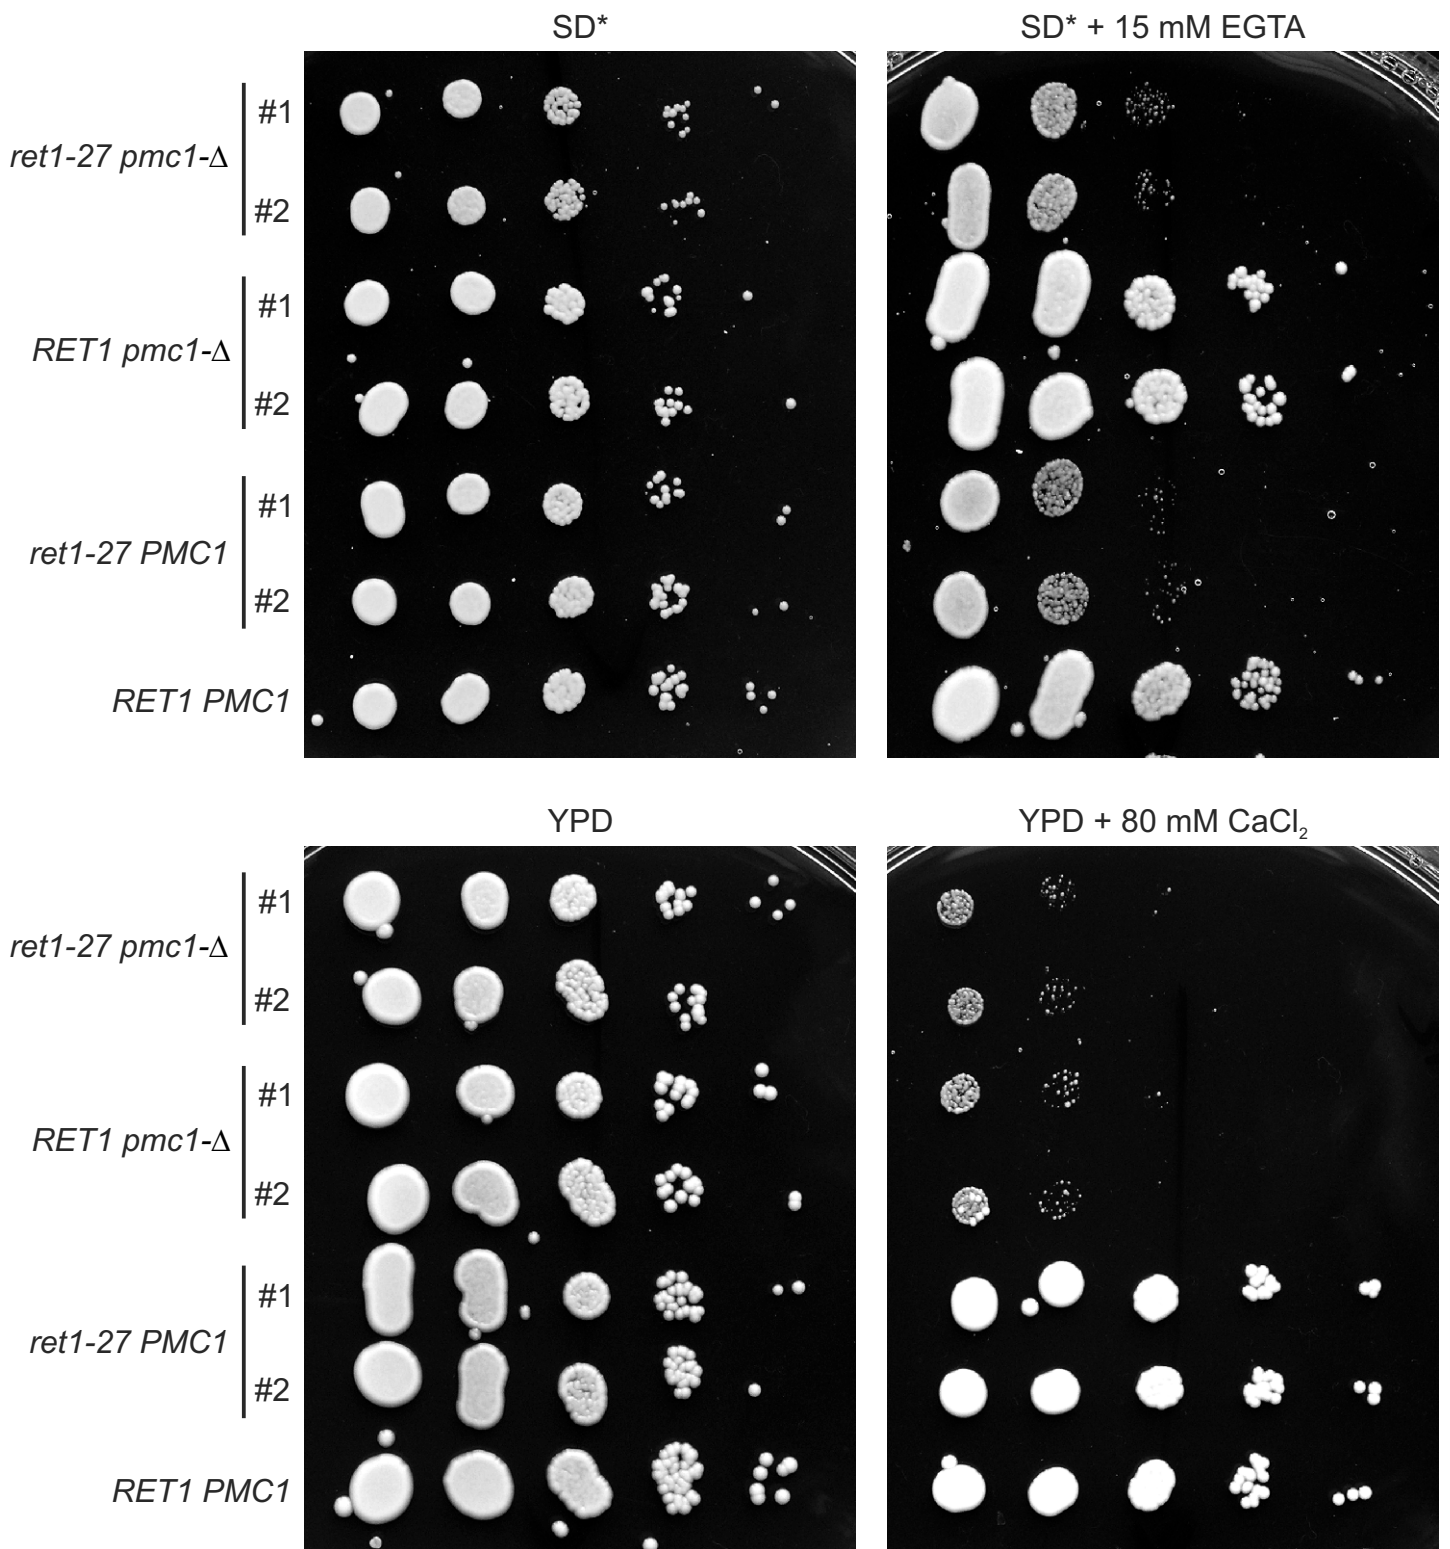

**S7 Fig. Sensitivity of the *ret1-27 pmc1-Δ* double mutant to a shortage (achieved by addition of EGTA) or excess of Ca<sup>2+</sup> in culture medium.** Cell suspensions with equal densities were serially diluted (10-fold) and spotted onto corresponding media. The replication of this experiment with additional concentrations of Ca<sup>2+</sup> and EGTA is shown in Fig. 5. *ret1-27 pmc1-Δ*, 64MA70QA-Δ*pmc1* strain; *pmc1-Δ*, 64MA70Q-RET-Δ*pmc1* strain; *ret1-27*, 64MA70QAL strain; *RET1 PMC1*, 64MA70QL-RET strain; #1 and #2, independently obtained clones.
